# Supplementary material for: Multi-faceted elastic flexibility of 1-naphthyl and 9-anthryl 2,2′:6′,2′′-terpyridine crystals
Source: Royal Society of Chemistry journal article supplement (doi:10.1039/d2ce01167k), 2022-01-01
Supplement: d2ce01167k1.pdf [file d2ce01167k1.pdf]

## SUPPLEMENTARY INFORMATION

### **Multi-faceted elastic flexibility of 1-naphthyl and 9-anthryl 2,2':6',2''-terpyridine crystals**

Sotaro Kusumoto\*, Karin Oishi, Manabu Nakaya, Ryo Suzuki, Masaru Tachibana, Yang Kim,  
Yoshihiro Koide\*, Shinya Hayami\*

E-mail: kusumoto@kanagawa-u.ac.jp

**Table S1.** Crystallographic data of **1** and **2**.

| Compound                   | <b>1</b>                                       | <b>2</b>                                       |
|----------------------------|------------------------------------------------|------------------------------------------------|
| formula                    | C <sub>25</sub> H <sub>17</sub> N <sub>3</sub> | C <sub>29</sub> H <sub>19</sub> N <sub>3</sub> |
| formula weight             | 359.41                                         | 409.47                                         |
| crystal system             | orthorhombic                                   | monoclinic                                     |
| space group                | <i>Pbca</i>                                    | <i>P2<sub>1</sub>/c</i>                        |
| a / Å                      | 11.0002(6)                                     | 12.7668(17)                                    |
| b / Å                      | 9.8052(7)                                      | 14.4310(16)                                    |
| c / Å                      | 34.289(2)                                      | 11.6963(18)                                    |
| α / °                      | 90                                             | 90                                             |
| β / °                      | 90                                             | 104.463(12)                                    |
| γ / °                      | 90                                             | 90                                             |
| V / Å <sup>3</sup>         | 3698.4(4)                                      | 2086.6(5)                                      |
| Z                          | 8                                              | 4                                              |
| T / K                      | 300                                            | 293                                            |
| R <sub>1</sub>             | 0.0638                                         | 0.0841                                         |
| R <sub>1</sub> (all data)  | 0.1125                                         | 0.2329                                         |
| wR <sub>2</sub>            | 0.1603                                         | 0.1953                                         |
| wR <sub>2</sub> (all data) | 0.1974                                         | 0.2924                                         |
| G.O.F.                     | 1.056                                          | 0.957                                          |
| CCDC                       | 2203397                                        | 2203398                                        |

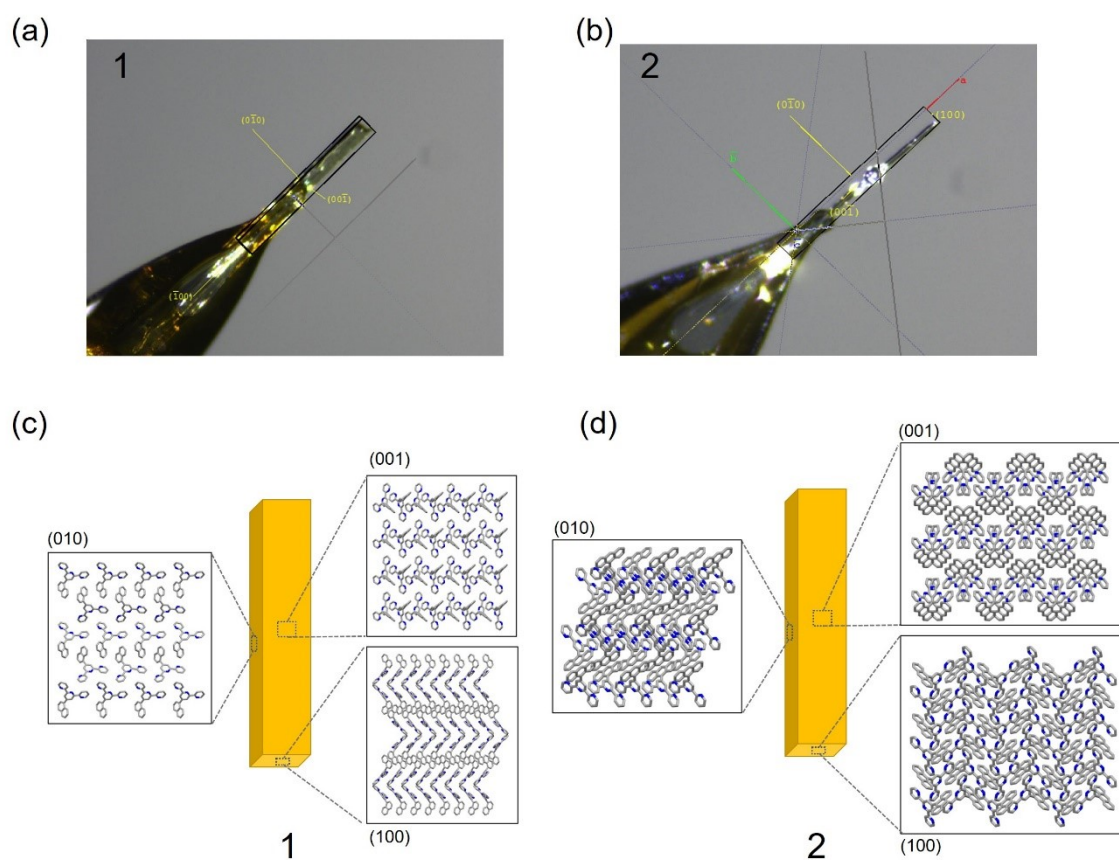

**Fig. S1** The face indices for (a) **1** and (b) **2**, and respective schematic representation of the crystal with face indices (c, d).

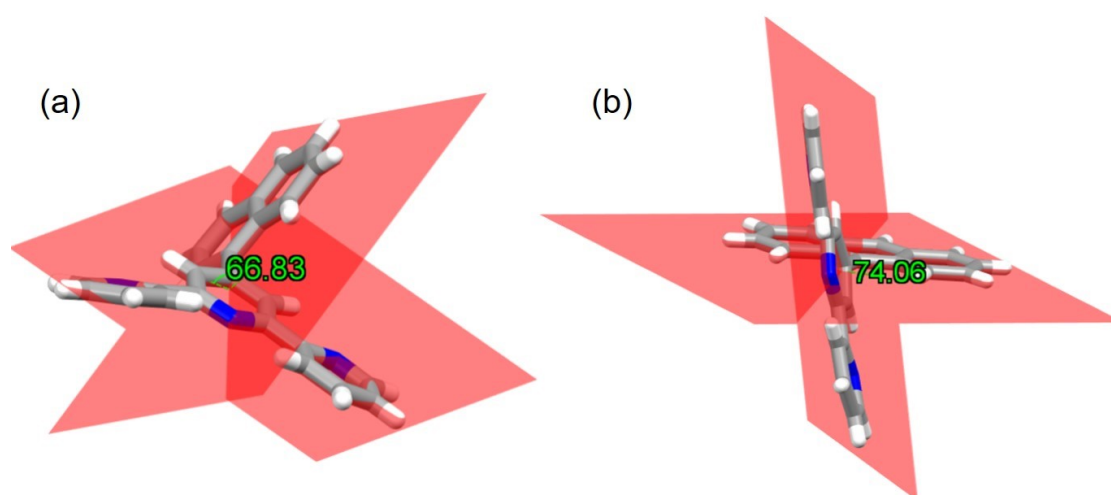

**Fig. S2** Dihedral angles between the central pyridine ring of terpyridine and 4'-positioned substituents; **1** (a) and **2** (b).

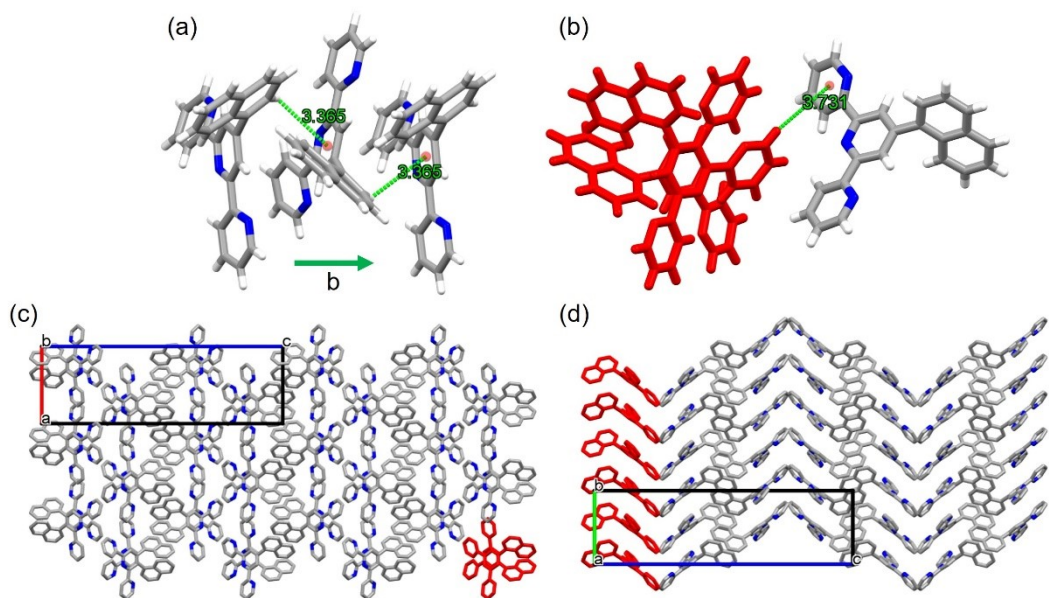

**Fig. S3** Crystal structure of **1**. (a) One-dimensional chain via CH--- $\pi$  interactions ( $d = 3.365 \text{ \AA}$ ) along  $b$ -axis. (b) CH--- $\pi$  interaction between 1D chain ( $d = 3.731 \text{ \AA}$ ). Packing structures viewed down  $b$ - (c) and  $a$ -axis (d) (The molecules in 1D chain are red.).

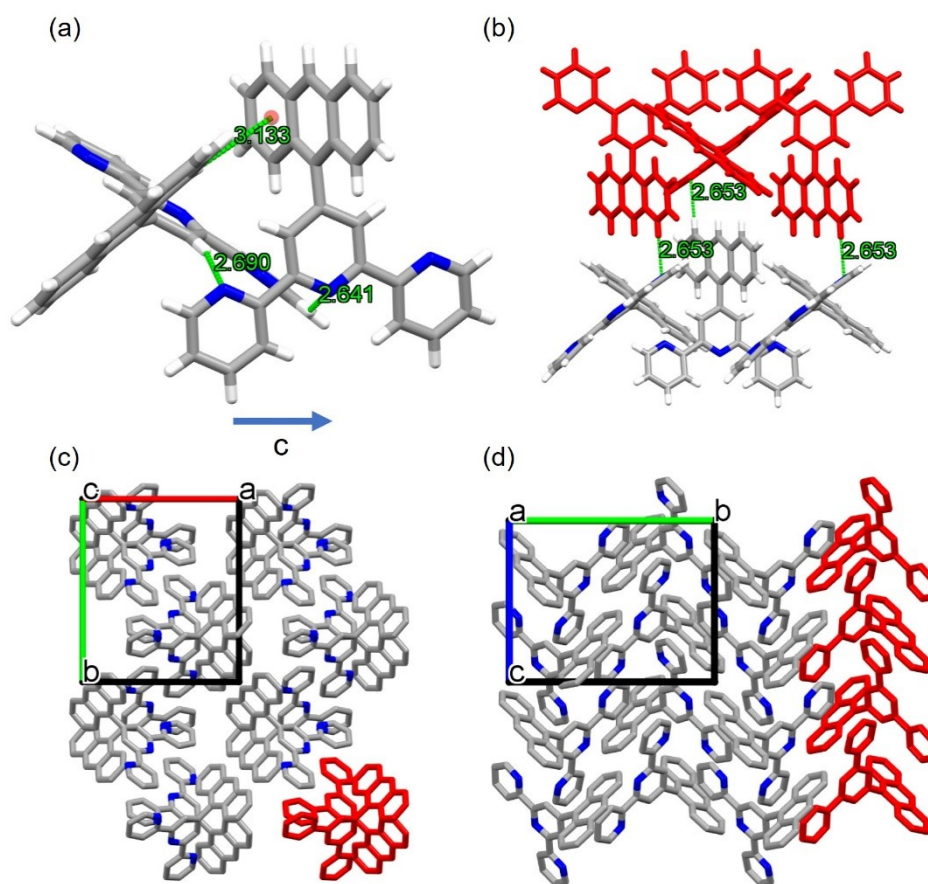

**Fig. S4** Crystal structure of **2**. (a) One-dimensional chain via N---H interactions ( $d = 2.690$  and  $2.641$  Å) and CH--- $\pi$  interactions ( $d = 3.133$  Å) along  $c$ -axis. (b) Interactions between 1D chains via N---H ( $d = 2.653$  Å). Packing structures viewed down  $c$ - (c) and  $a$ -axis (d) (The molecules in 1D chain are red.).

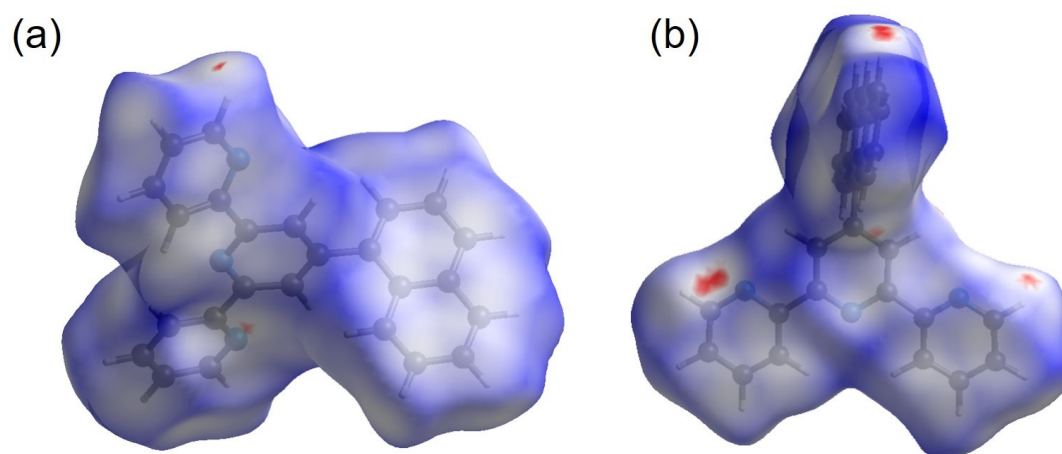

**Fig. S5** Hirschfeld surface analyses of **1** (a) and **2** (b).

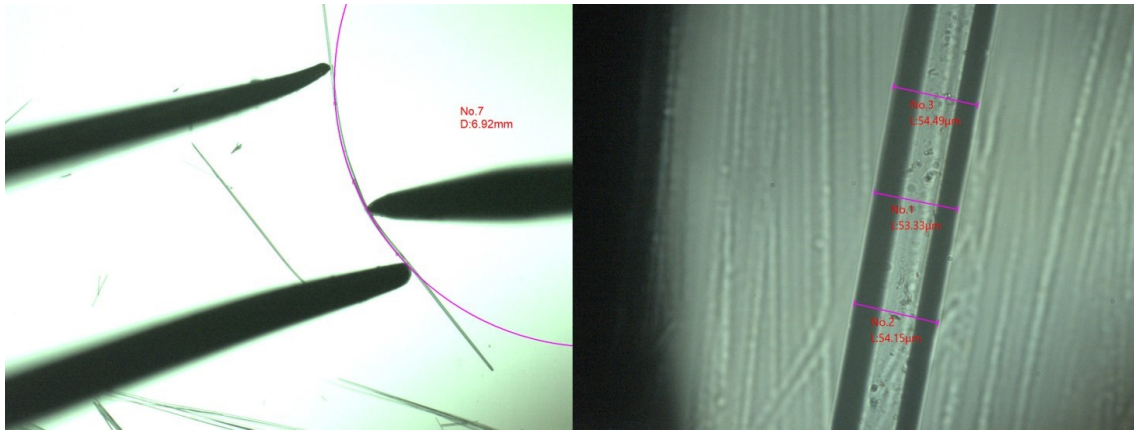

**Fig. S6** Strain measurement for crystal **1** by applying force to (010). The thickness of crystal (right) and the radius of the curvature before cleavage (left).

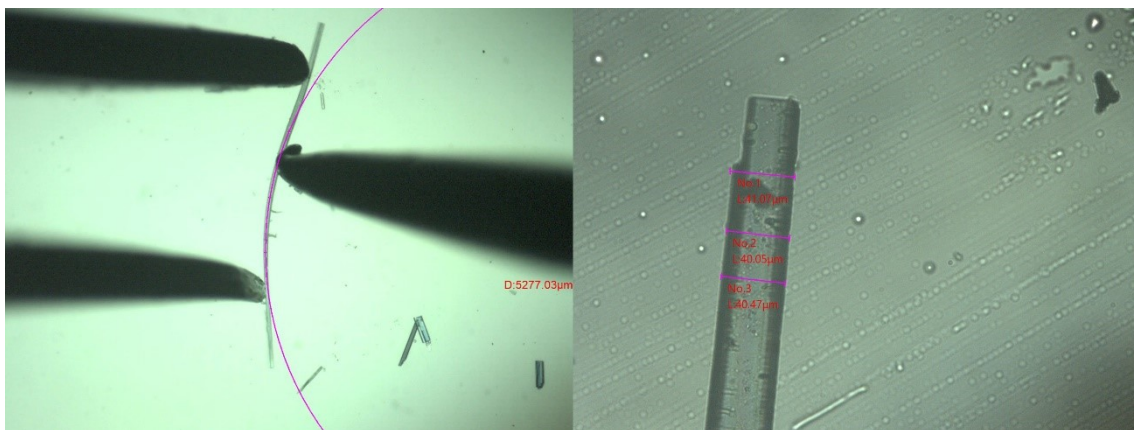

**Fig. S7** Strain measurement for crystal **1** by applying force to (001). The thickness of crystal (right) and the radius of the curvature before cleavage (left).



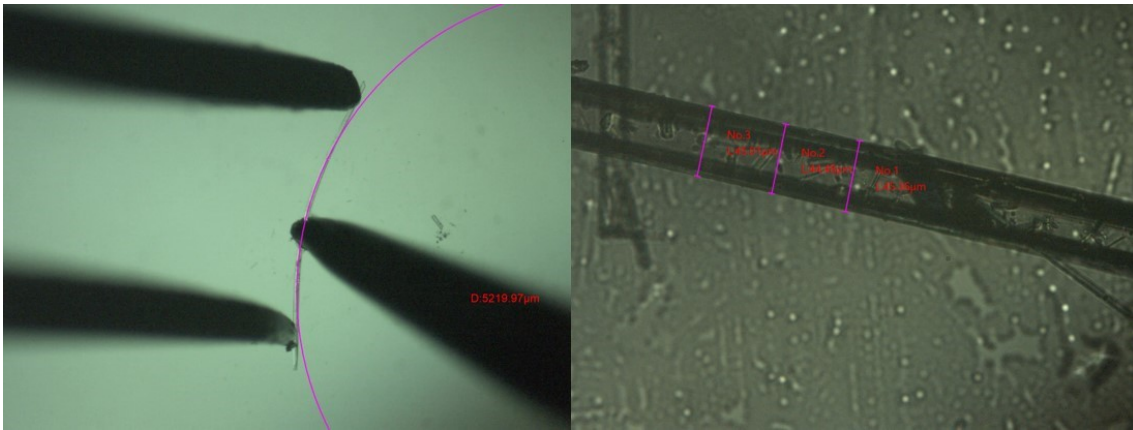

**Fig. S8** Strain measurement for crystal **2** by applying force to (010). The thickness of crystal (right) and the radius of the curvature before cleavage (left).

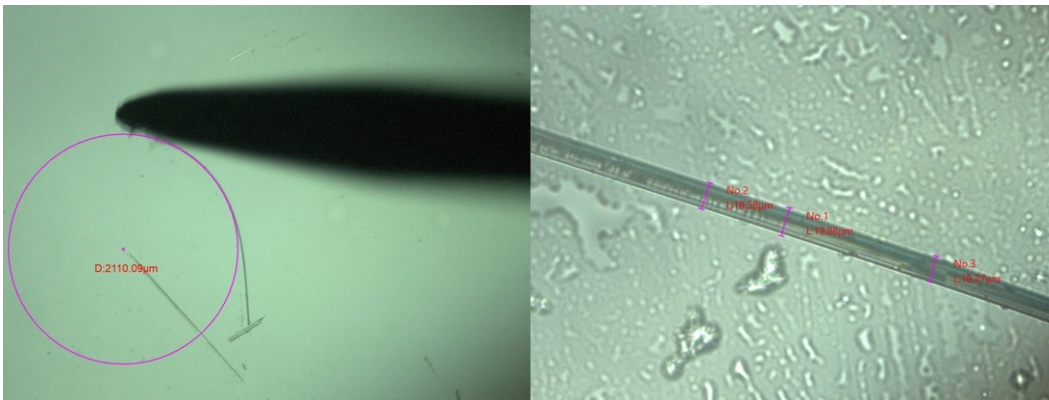

**Fig. S9** Strain measurement for crystal **2** by applying force to (001). The thickness of crystal (right) and the radius of the curvature before cleavage (left).



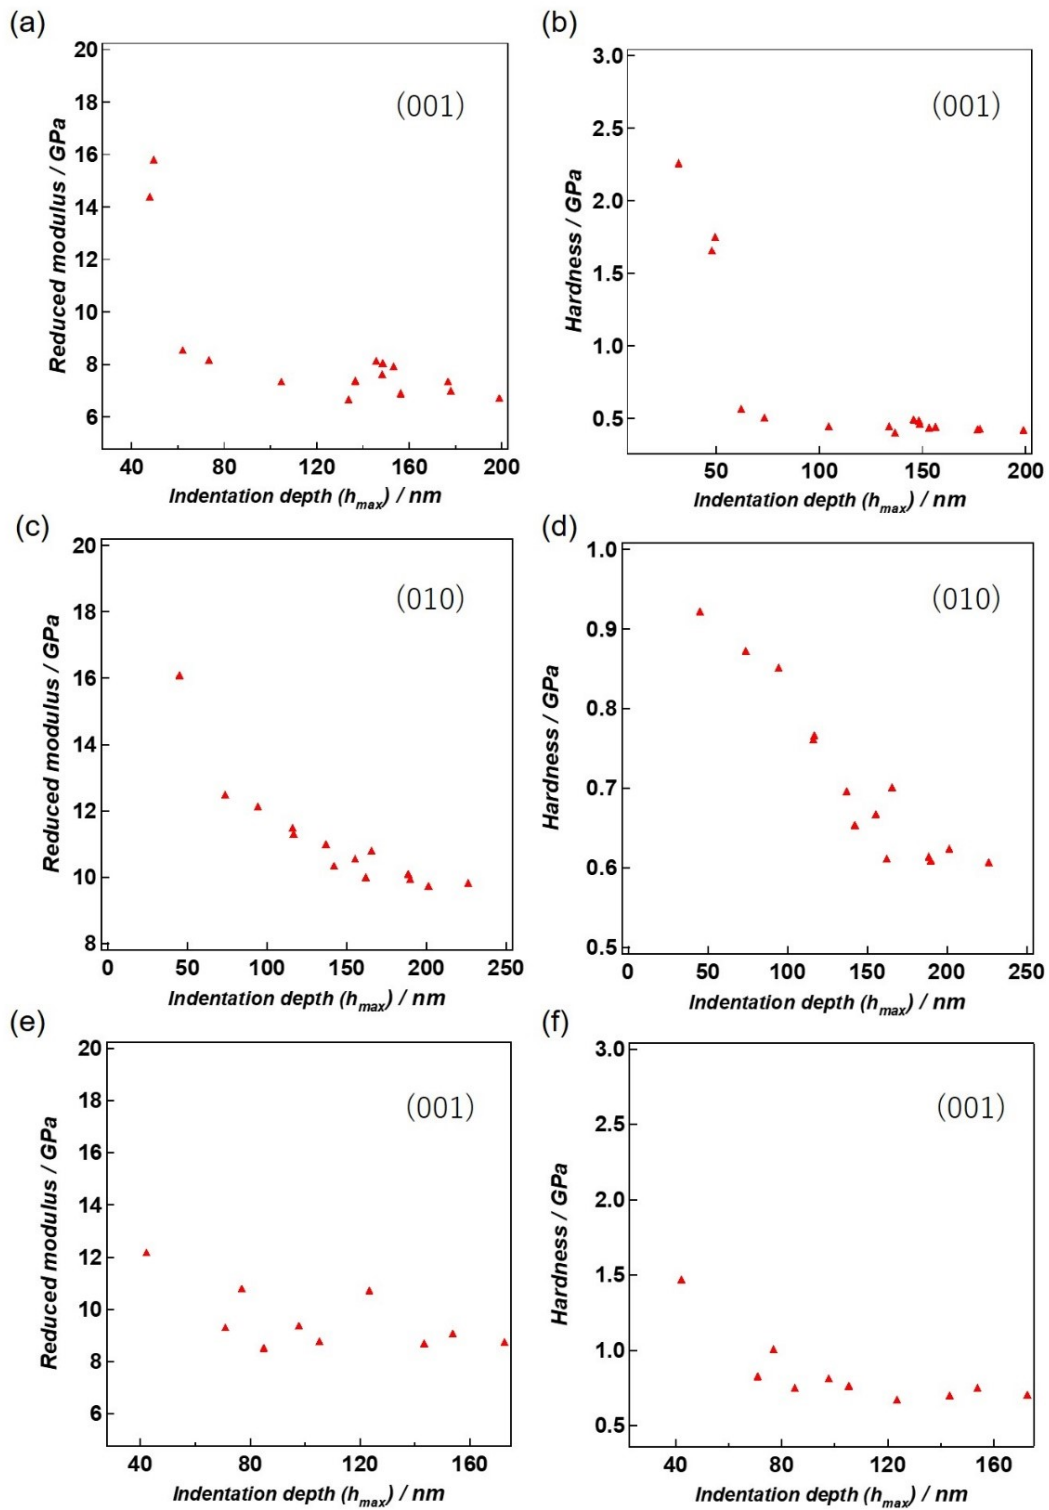

**Fig. S10** Indentation depths ( $h_{max}$ ) depending on 'Reduced modulus' (GPa) and 'Hardness' (GPa) on the surfaces of each crystal **1** (a-d) and **2** (e, f).

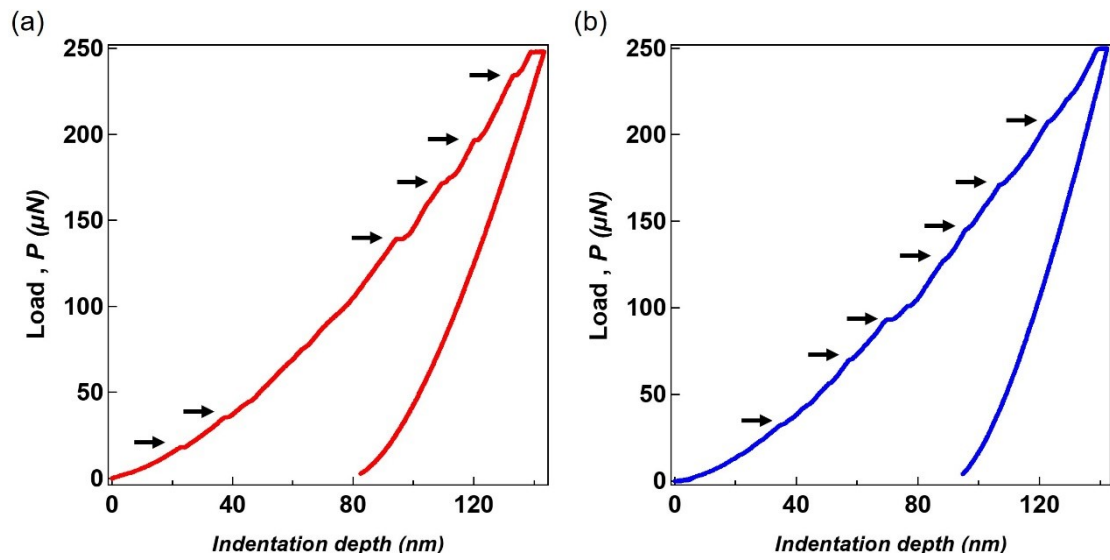

**Fig. S11**  $P$ - $h$  curves when the maximum load of 250  $\mu\text{N}$  is applied on each crystal **1** (010) (a) and **2** (001) (b). Black arrows represent pop-ins.

## Energy Framework Calculations

Energy frameworks for **1** and **2** were constructed from pairwise intermolecular interaction energy calculations (at crystal geometry) using the B3LYP/6-31G(d,p) molecular wave functions with CrystalExplorer17.5.<sup>[ref 20 in the main text]</sup> Total interaction energy decomposition into electrostatic, polarization, dispersion and exchange-repulsion terms can be obtained from a scaling scheme.

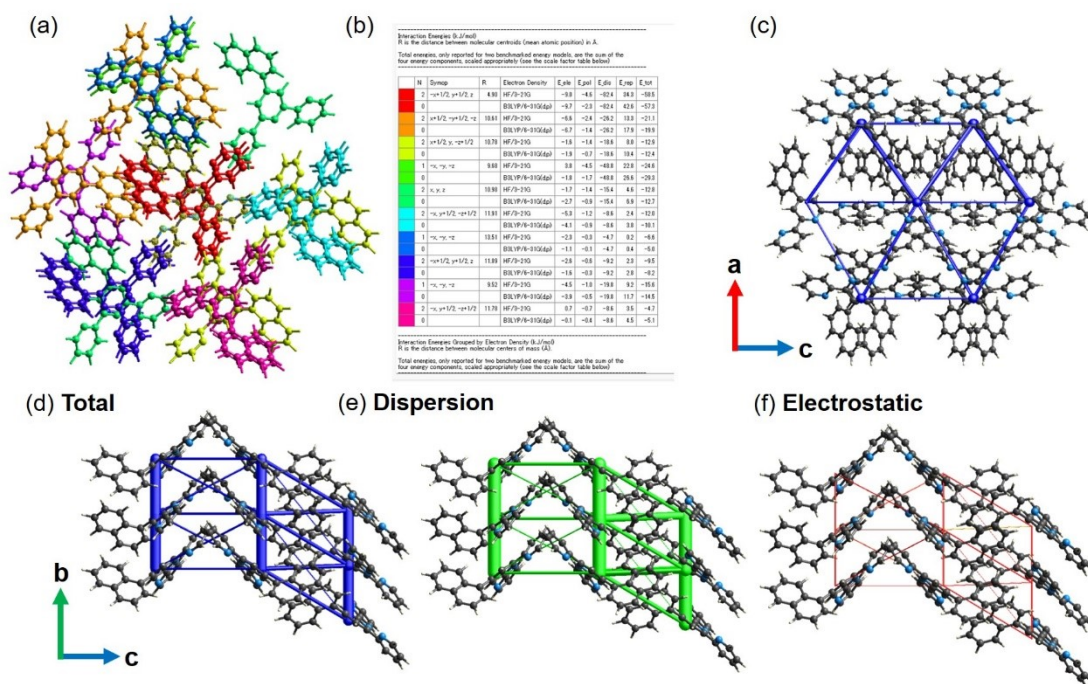

**Fig. S12** (a, b) The interaction energies of various dimeric molecules estimated using CE-B3LYP method for **1**. (c) Energy frameworks in total interaction strengths viewed down the *b*-axis. Energy frameworks viewed down the *a*-axis are represented in Total (d), Dispersion (e), and Electrostatic energy (f).

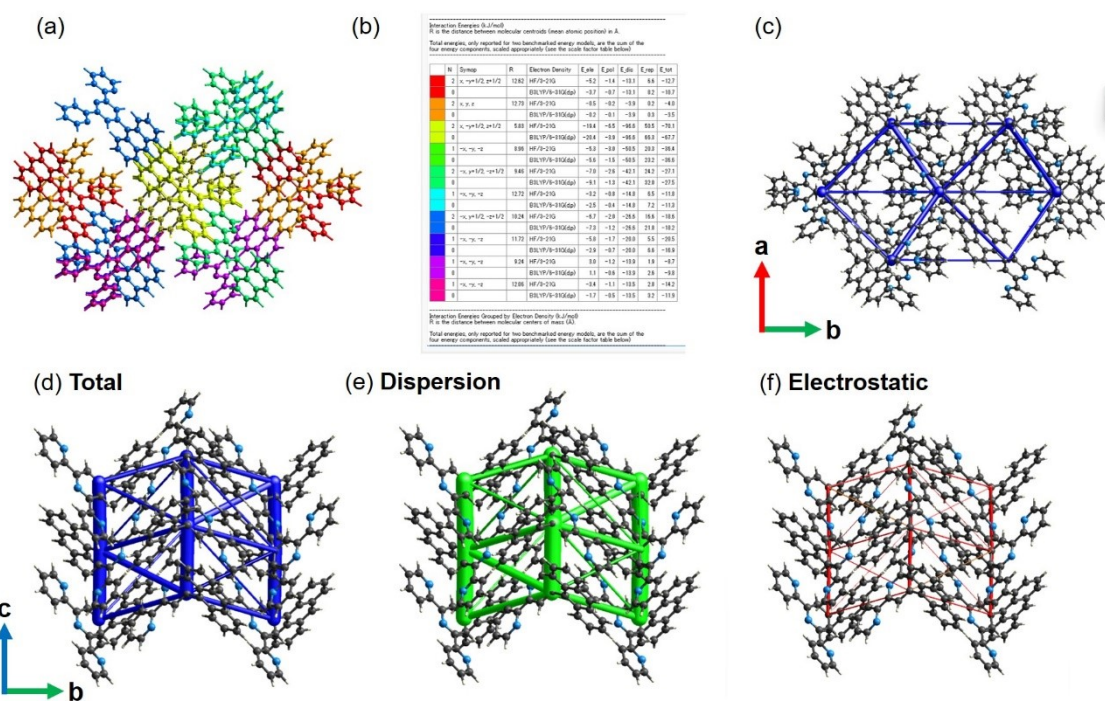

**Fig. S13** (a, b) The interaction energies of various dimeric molecules estimated using CE-B3LYP method for **2**. (c) Energy frameworks in total interaction strengths viewed down the *c*-axis. Energy frameworks viewed down the *a*-axis are represented in Total (d), Dispersion (e), and Electrostatic energy (f).

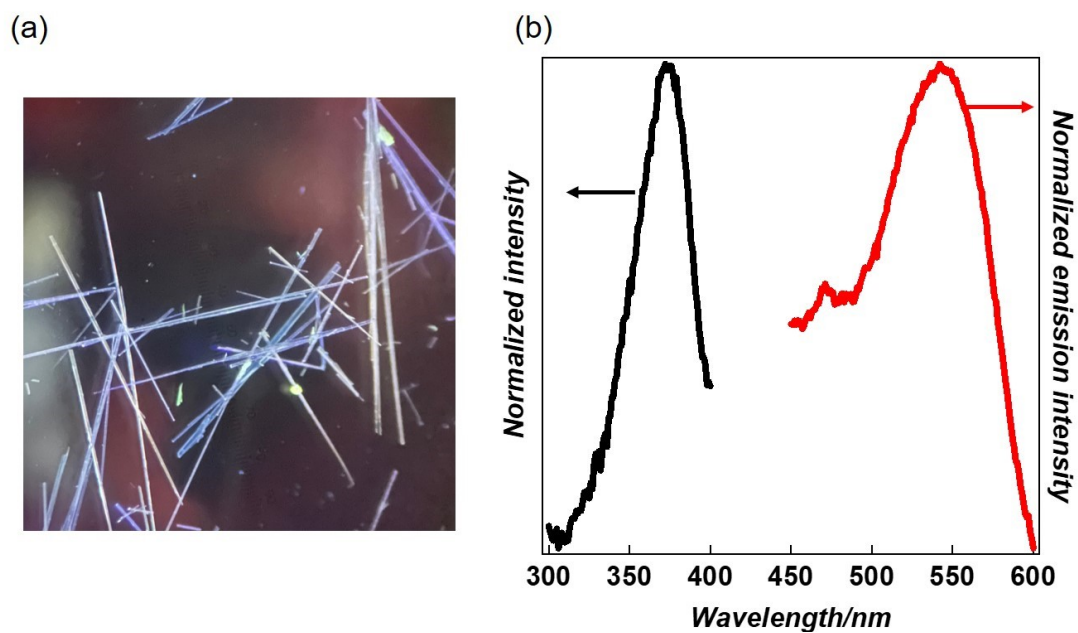

**Fig. S14** (a) Photograph of crystals **1** under UV irradiation (365 nm). (b) Luminescence ( $\lambda_{\text{ex}} = 350 \text{ nm}$ , red line) and excitation spectrum ( $\lambda_{\text{mon}} = 525 \text{ nm}$ , black line) of **1**.

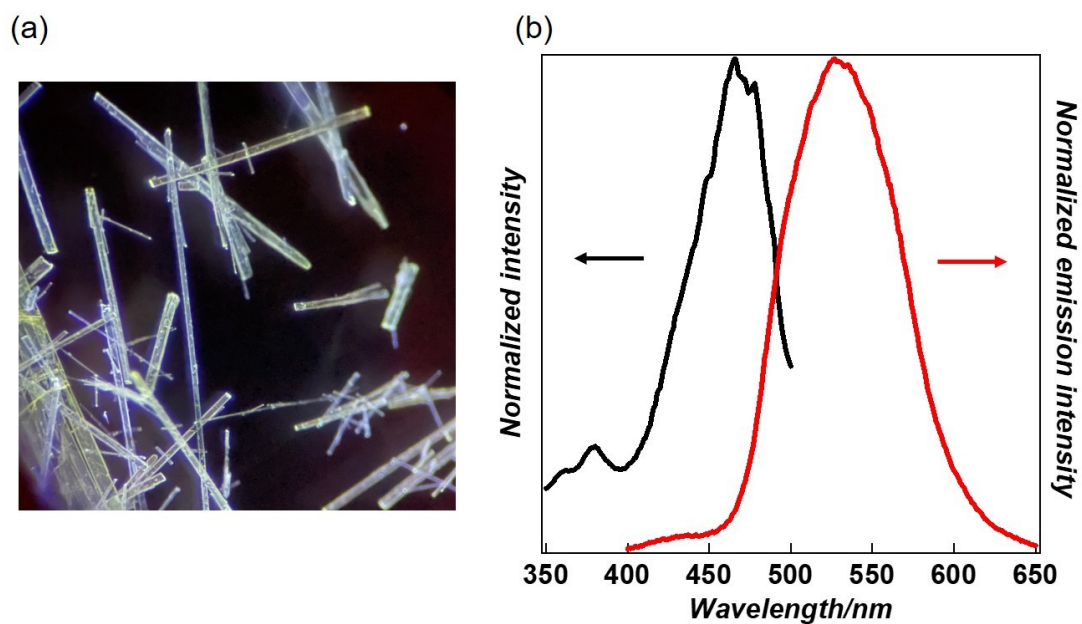

**Fig. S15** (a) Photograph of crystals **2** under UV irradiation (365 nm). (b) Luminescent ( $\lambda_{\text{ex}} = 400 \text{ nm}$ , red line) and excitation spectrum ( $\lambda_{\text{mon}} = 540 \text{ nm}$ , black line).
